# Supplementary material for: Plasma Gelsolin Levels Decrease in Diabetic State and Increase upon Treatment with F-Actin Depolymerizing Versions of Gelsolin
Source: Hindawi journal article supplement (doi:10.1155/2014/152075), 2014-01-01
Supplement: f1 [file 152075.f1.pdf]

### Supplementary Table 1

**Clinical characteristics of human subjects included for type II diabetes studies.  
Values are mean  $\pm$  S.E.M.**

| Parameter                     | Non-diabetic    |                 | Diabetic        |                 |
|-------------------------------|-----------------|-----------------|-----------------|-----------------|
|                               | Male            | Female          | Male            | Female          |
| Age (Years)                   | 40.6            |                 | 43.4            |                 |
| Sex                           | Male            | Female          | Male            | Female          |
|                               | N=7             | N=8             | N=17            | N=10            |
| Body Weight (kg)              | 71.5 $\pm$ 2.8  | 66.3 $\pm$ 8.8  | 73.8 $\pm$ 0.6  | 67.4 $\pm$ 2.6  |
| Fasting Blood Glucose (mg/dl) | 107.6 $\pm$ 4.6 | 100.5 $\pm$ 0.6 | 175 $\pm$ 2.8   | 204.2 $\pm$ 2.2 |
| HbA1c (%)                     | 5.5 $\pm$ 1.2   | 4.9 $\pm$ 1.4   | 8.2 $\pm$ 3.8   | 8.9 $\pm$ 3.6   |
| Fasting cholesterol (mg/dl)   | 157.3 $\pm$ 1.4 | 151.5 $\pm$ 6.2 | 221.6 $\pm$ 2.8 | 227.1 $\pm$ 0.9 |
| Fasting triglyceride (mg/dl)  | 101.1 $\pm$ 1.5 | 111.3 $\pm$ 8.9 | 171.2 $\pm$ 2.2 | 198.5 $\pm$ 9.8 |

**Supplementary Fig. 1**

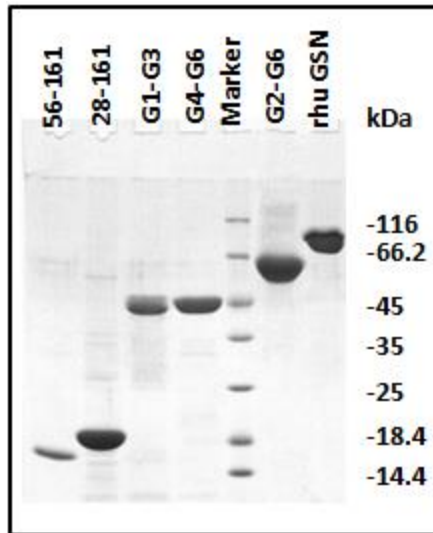

**Supplementary Figure 1** A representative Coomassie blue stained SDS-PAGE (15%) gel picture showing full length recombinant human gelsolin (rhuGSN) and its truncates along with the molecular weight markers is illustrated here. Sizes of molecular weight markers are shown on the right as kDa.
